# Supplementary material
Source: MDPI journal article supplement (https://www.mdpi.com/2071-1050/14/10/5894)
Supplement: s1 [file s1 › sustainability-1688370-supplementary.pdf]

## **Supplementary material**

### **Effects of increasing concentrations of enrofloxacin on co-digestion of pig manure and corn straw**

Qihang Shu, Hongkuan Cheng, Xiaxia Chen, Jie Wang, Zunqing Du, Jun Hong,  
Zheng Zheng, Xingzhang Luo\*

Department of Environmental Science and Engineering, Fudan University, Shanghai  
200433, PR China

---

\*Corresponding authors.  
Tel. and Fax: +86-21-31248911  
E-mail addresses: lxz@fudan.edu.cn (X. Luo).

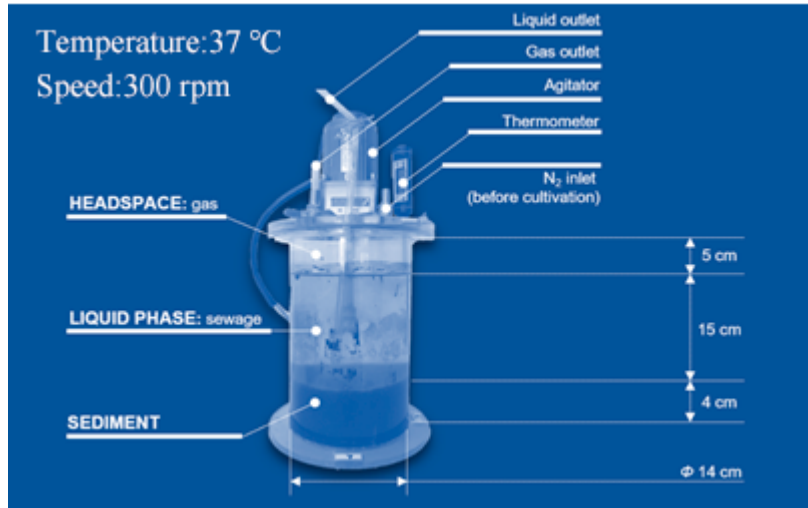

**Figure S1.** Detailed diagram of experimental reactors.

**Table S1.** Main properties of substrates and inoculum.

| Properties          | Unit  | PM    | CSP   | Inoculum |
|---------------------|-------|-------|-------|----------|
| Total solid (TS)    | %(w)  | 16.02 | 92.15 | 2.54     |
| Volatile solid (VS) | %(w)  | 9.05  | 60.67 | 1.20     |
| VS/TS               | %     | 56.51 | 65.84 | 47.34    |
| pH                  | —     | 7.61  | 6.89  | 7.44     |
| Carbon, C           | %(TS) | 44.74 | 42.62 | —        |
| Nitrogen, N         | %(TS) | 2.01  | 1.66  | —        |
| Hydrogen, H         | %(TS) | 6.17  | 5.68  | —        |
| Sulfur, S           | %(TS) | 0.52  | 0.31  | —        |
| C/N ratio           | —     | 22.31 | 37.72 | —        |

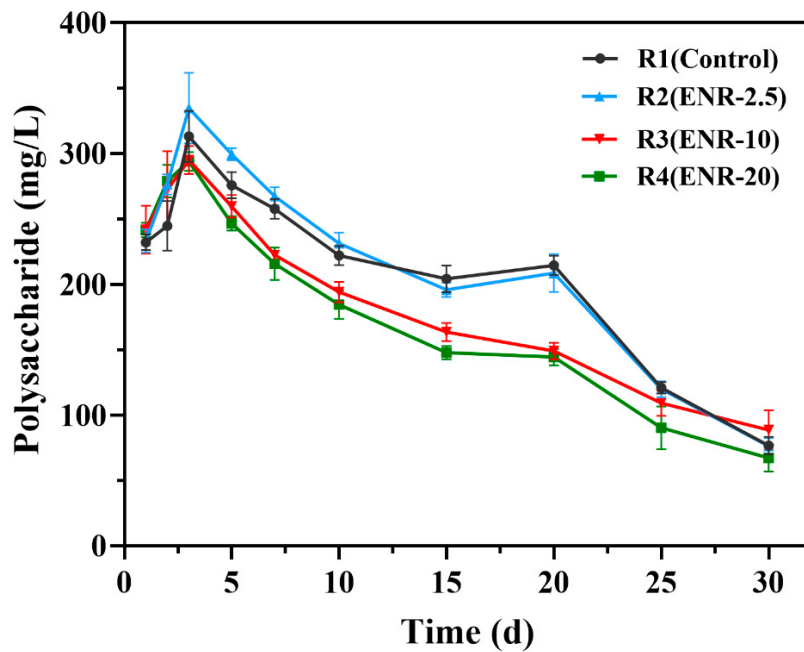

**Figure S2.** Changes in polysaccharide concentration (day 1-30) of R1 (control group); R2 (with 2.5 mg/L ENR addition); R3 (with 10 mg/L ENR addition); R4 (with 20 mg/L ENR addition).

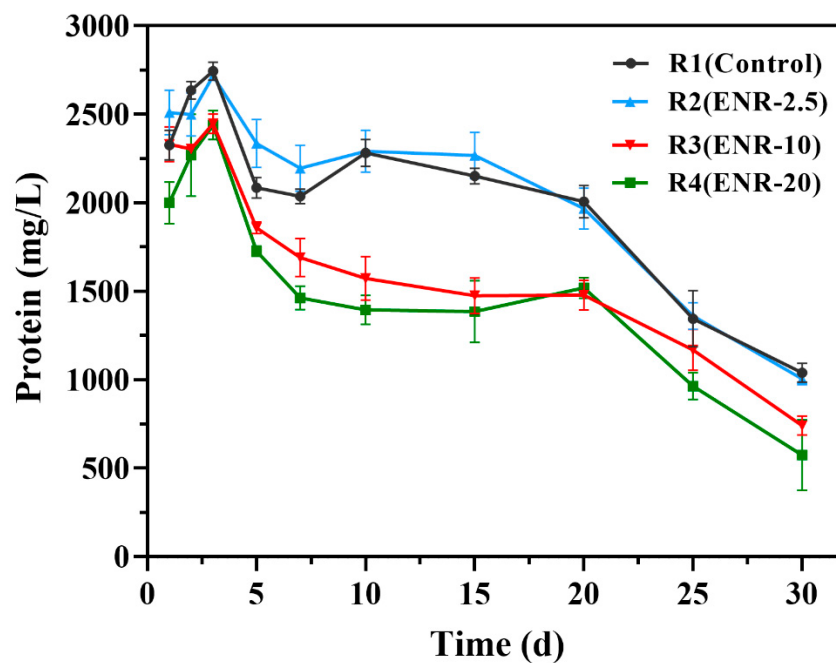

**Figure S3.** Changes in protein concentration (day 1-30) of R1 (control group); R2 (with 2.5 mg/L ENR addition); R3 (with 10 mg/L ENR addition); R4 (with 20 mg/L ENR addition).
